# Supplementary material for: Chromium tetraphosphide (CrP4) as a high-performance anode for Li ion and Na ion batteries
Source: Royal Society of Chemistry journal article supplement (doi:10.1039/d4ta00854e), 2024-01-01
Supplement: d4ta00854e1.pdf [file d4ta00854e1.pdf]

Electronic Supplementary Information (ESI)

## **Chromium tetrphosphide (CrP<sub>4</sub>) as a high performance anode for Li ion and Na ion batteries**

Jongwon Lee<sup>a</sup>, Doyeon Lee<sup>a</sup>, Kyeong-Ho Kim<sup>\*b</sup>, and Seong-Hyeon Hong<sup>\*a</sup>

<sup>a</sup> Department of Materials Science and Engineering and Research Institute of Advanced Materials, Seoul National University, Seoul 08826, Republic of Korea.

<sup>b</sup> Department of Materials Science and Engineering, Pukyong National University, Busan 48513, Republic of Korea.

\* Corresponding author

Prof. Kyeong-Ho Kim (K.-H. Kim)

E-mail: khkim213@pknu.ac.kr

Prof. Seong-Hyeon Hong (S.-H. Hong)

E-mail: shhong@snu.ac.kr

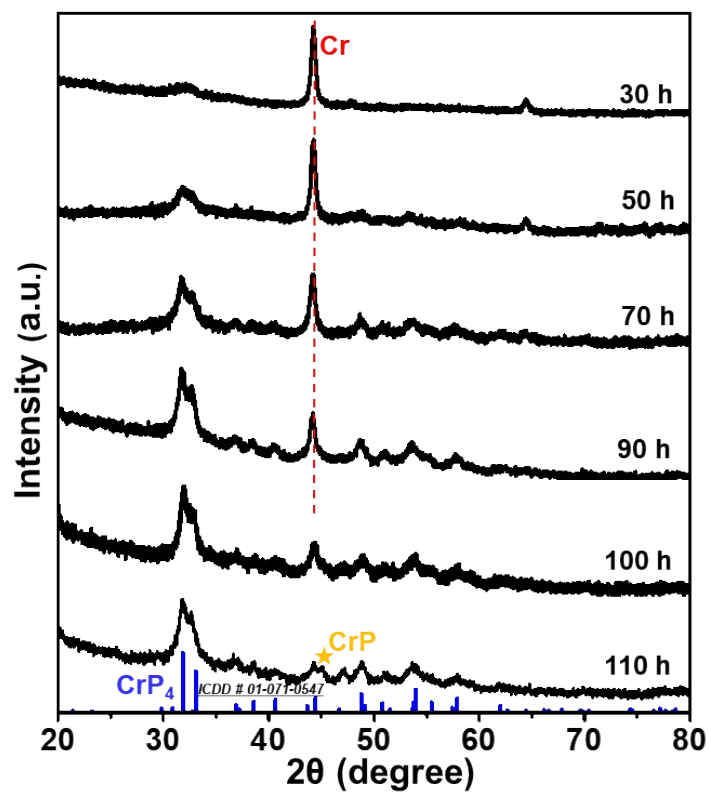

Fig. S1 XRD patterns of as-synthesized powder at different milling times.

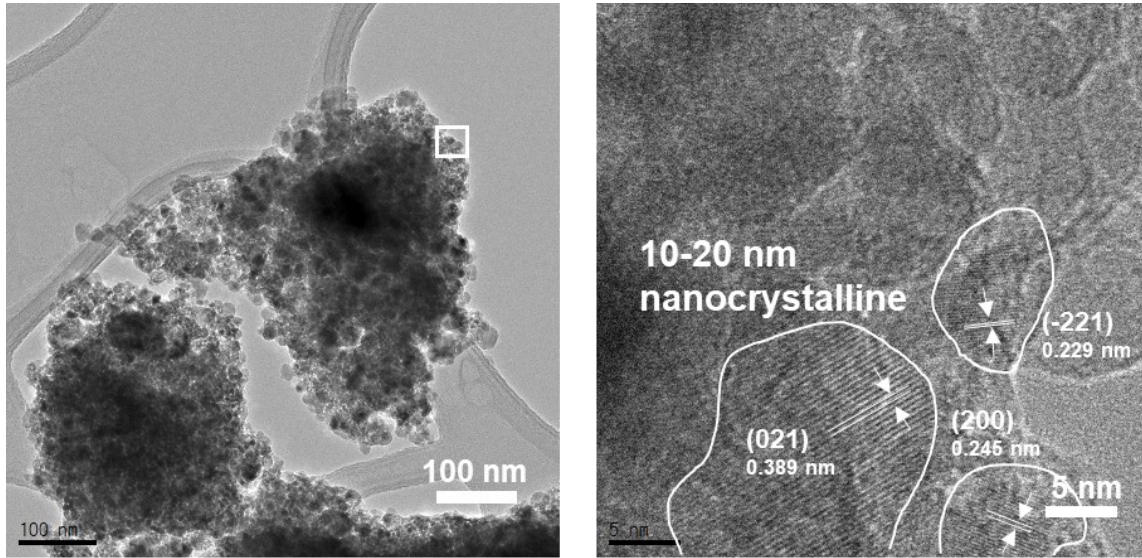

**Fig. S2** TEM images of as-synthesized CrP<sub>4</sub> nanoparticles.

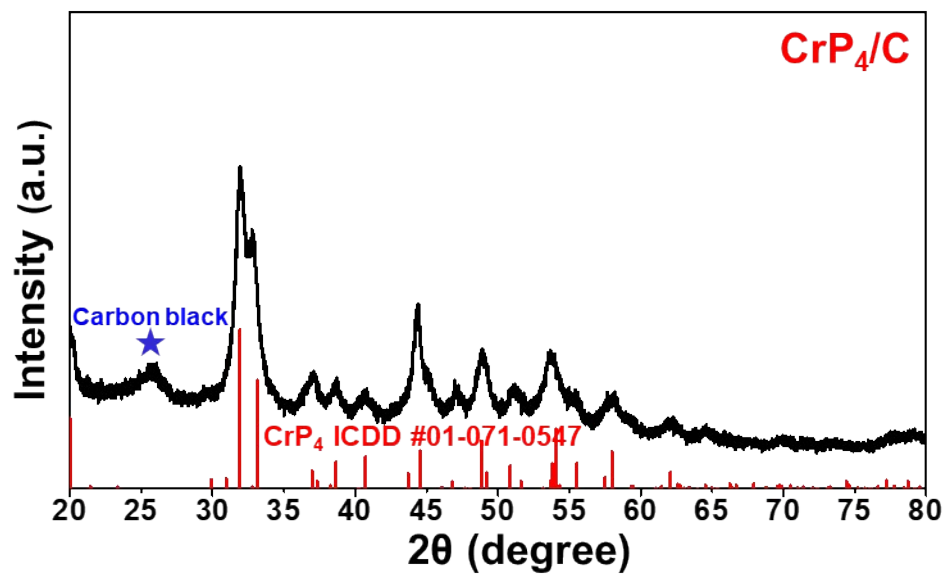

Fig. S3 XRD pattern of as-synthesized CrP<sub>4</sub>/C nanocomposite.

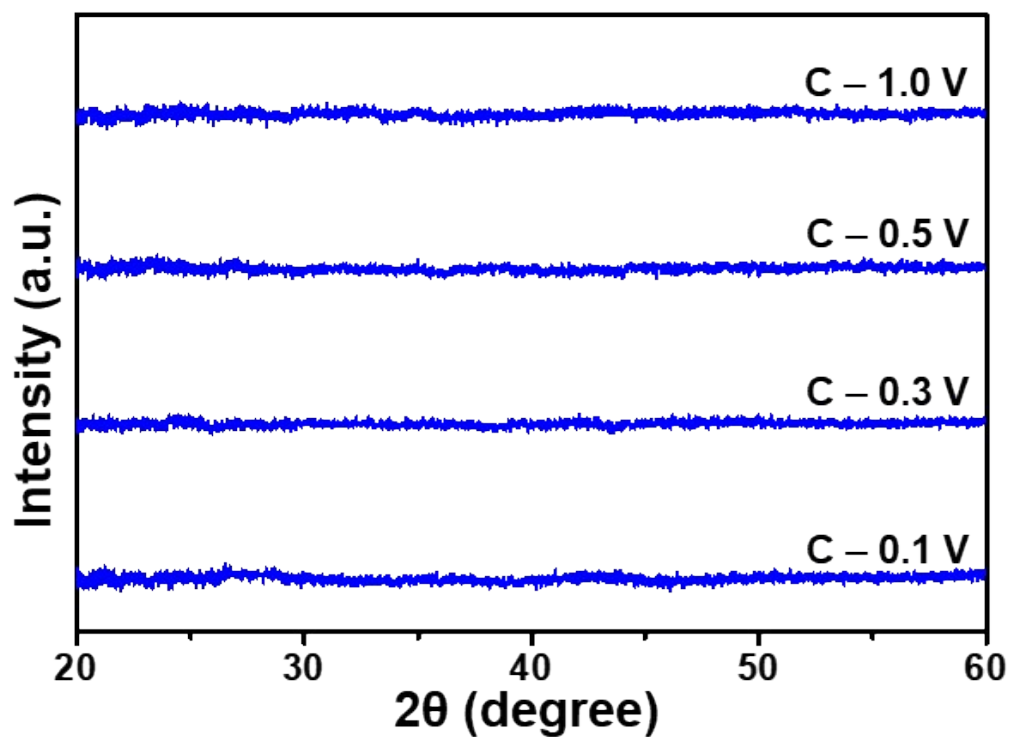

**Fig. S4** *Ex-situ* XRD patterns of the CrP<sub>4</sub> electrode at various 1<sup>st</sup> charged states.

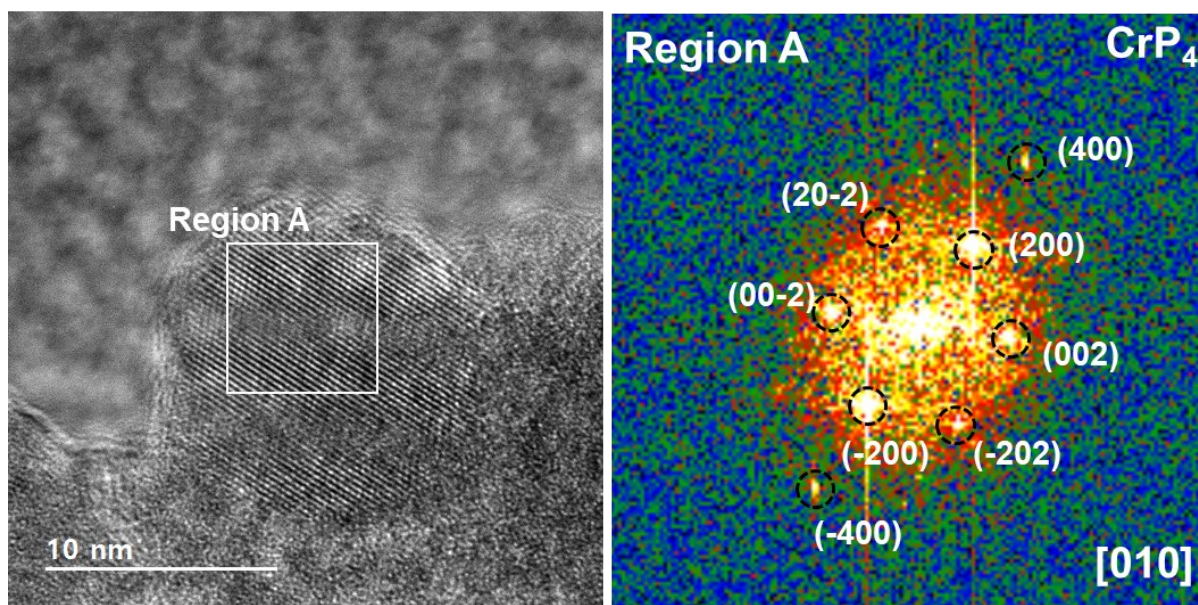

**Fig. S5** HRTEM image and FFT pattern of the 1<sup>st</sup> fully charged (2.5 V vs. Li/Li<sup>+</sup>) CrP<sub>4</sub> electrode for LIBs.

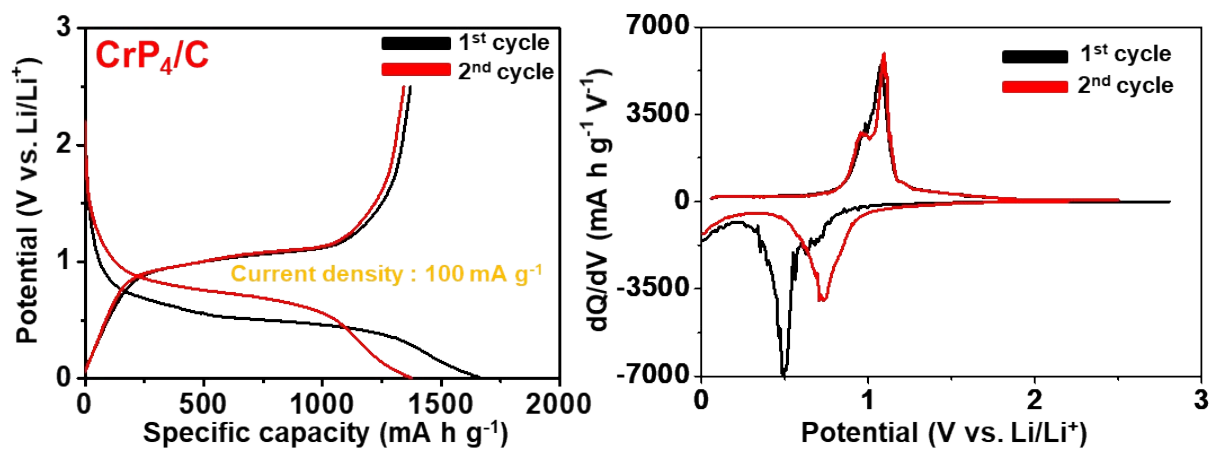

**Fig. S6** Capacity-voltage profiles and corresponding DCPs of CrP<sub>4</sub>/C electrode for LIBs at a current density of 100 mA g<sup>-1</sup>.

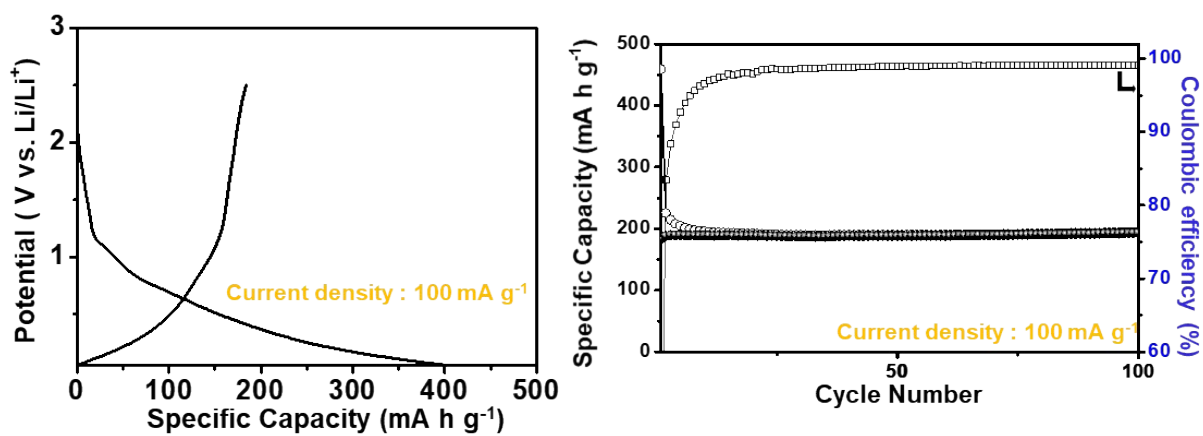

**Fig. S7** Voltage profile and cycle performance of acetylene carbon black electrode for LIBs at a current density of 100 mA g<sup>-1</sup>.



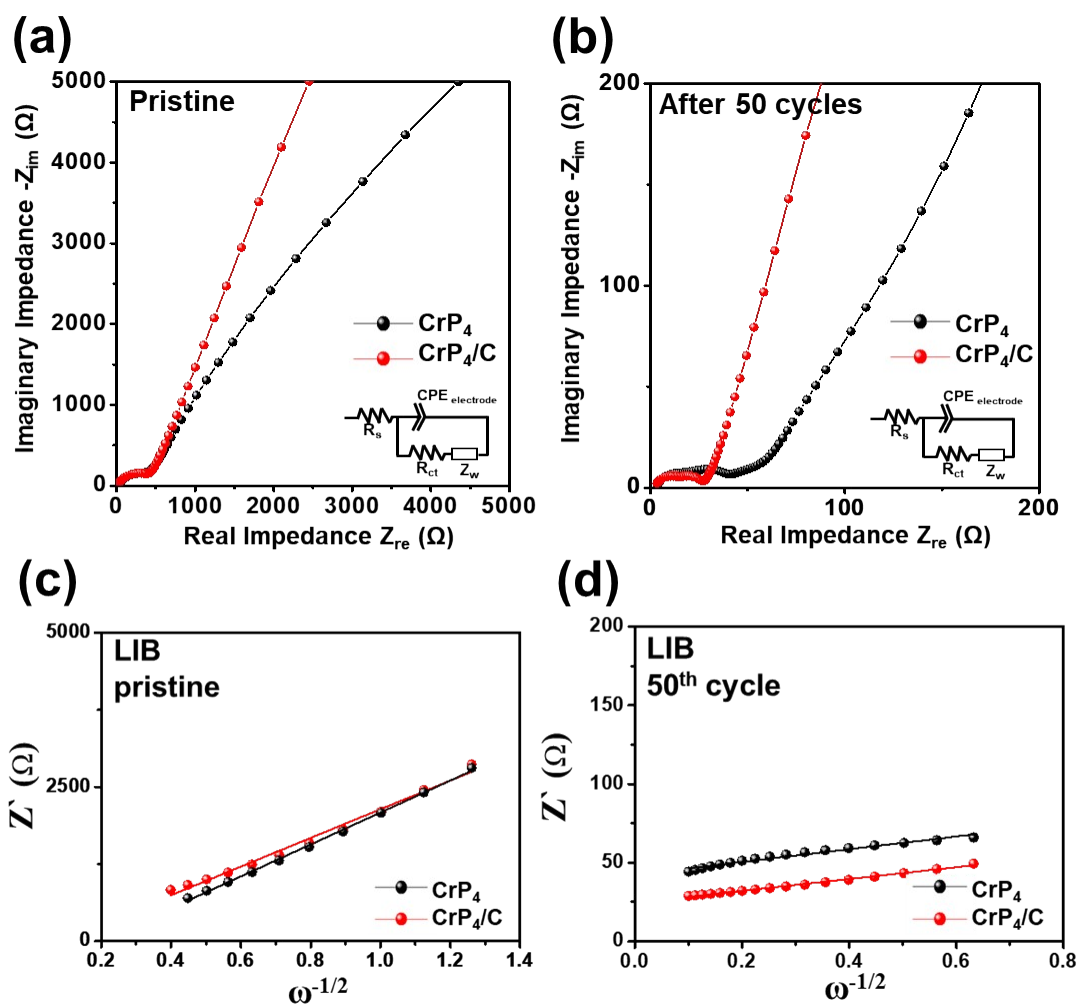

**Fig. S8** Fitted Nyquist plots of  $\text{CrP}_4$  and  $\text{CrP}_4/\text{C}$  electrodes (a) at pristine and (b) after 50 cycles and relationship between  $Z'$  and  $\omega^{-1/2}$  (c) at pristine and (d) after 50 cycles at a current density of  $1000 \text{ mA g}^{-1}$  in LIBs.

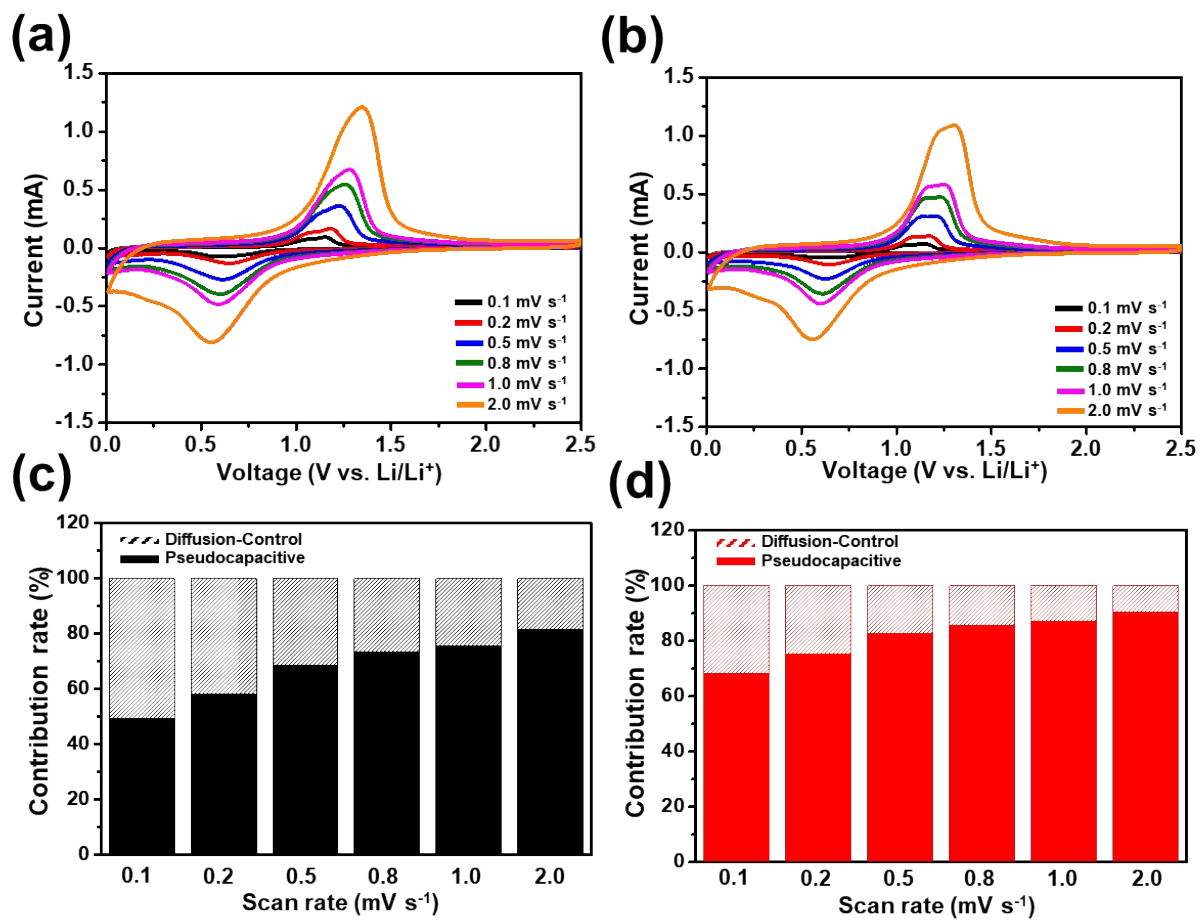

**Fig. S9** CV curves and corresponding normalized contribution ratios of diffusion-controlled and pseudocapacitive-controlled at various scan rates from 0.1-2.0 mV s<sup>-1</sup> of (a, c) CrP<sub>4</sub> and (b, d) CrP<sub>4</sub>/C electrodes in LIBs, respectively.

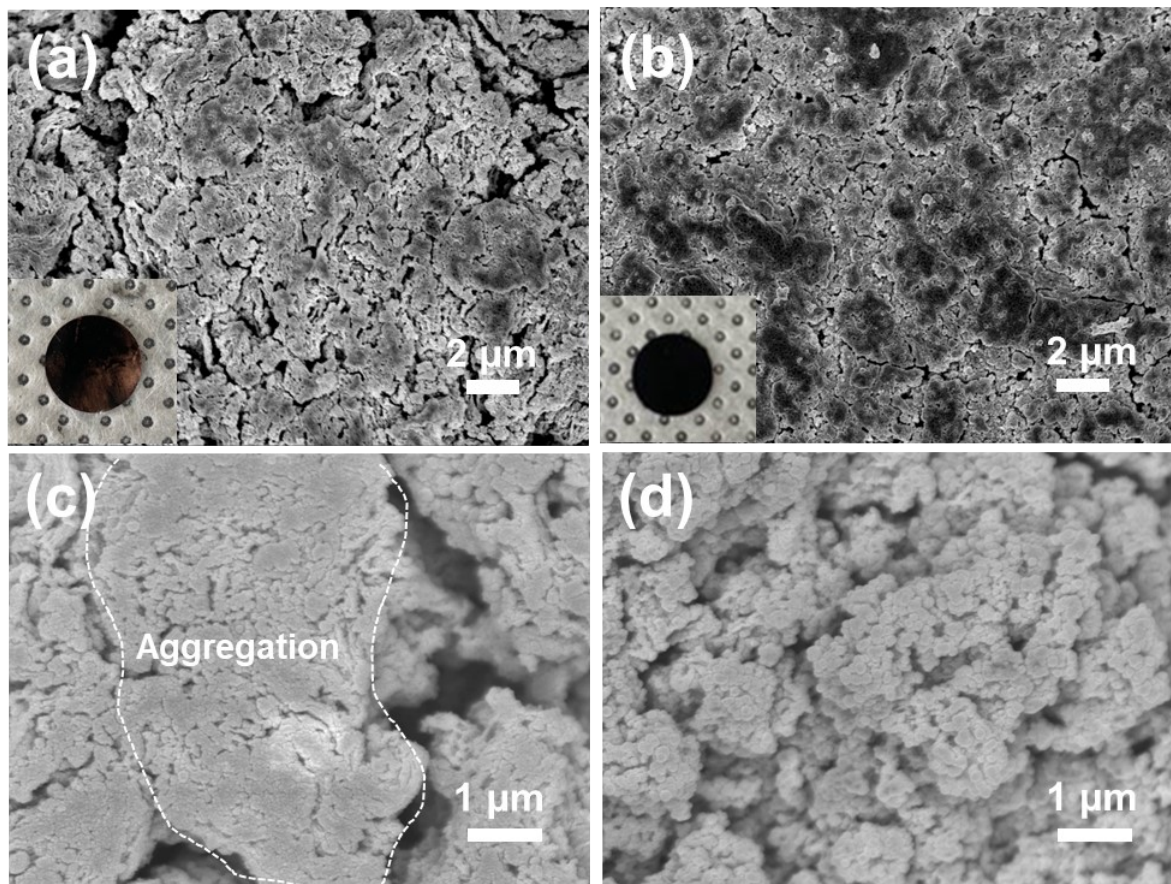

**Fig. S10** SEM images of the electrodes before and after rinsing SEI layer of (a,c) CrP<sub>4</sub> and (b,d) CrP<sub>4</sub>/C electrodes, respectively, after 50 cycles at a current density of 1000 mA g<sup>-1</sup> in LIBs (inset in (a) and (b): optical images of each electrodes).

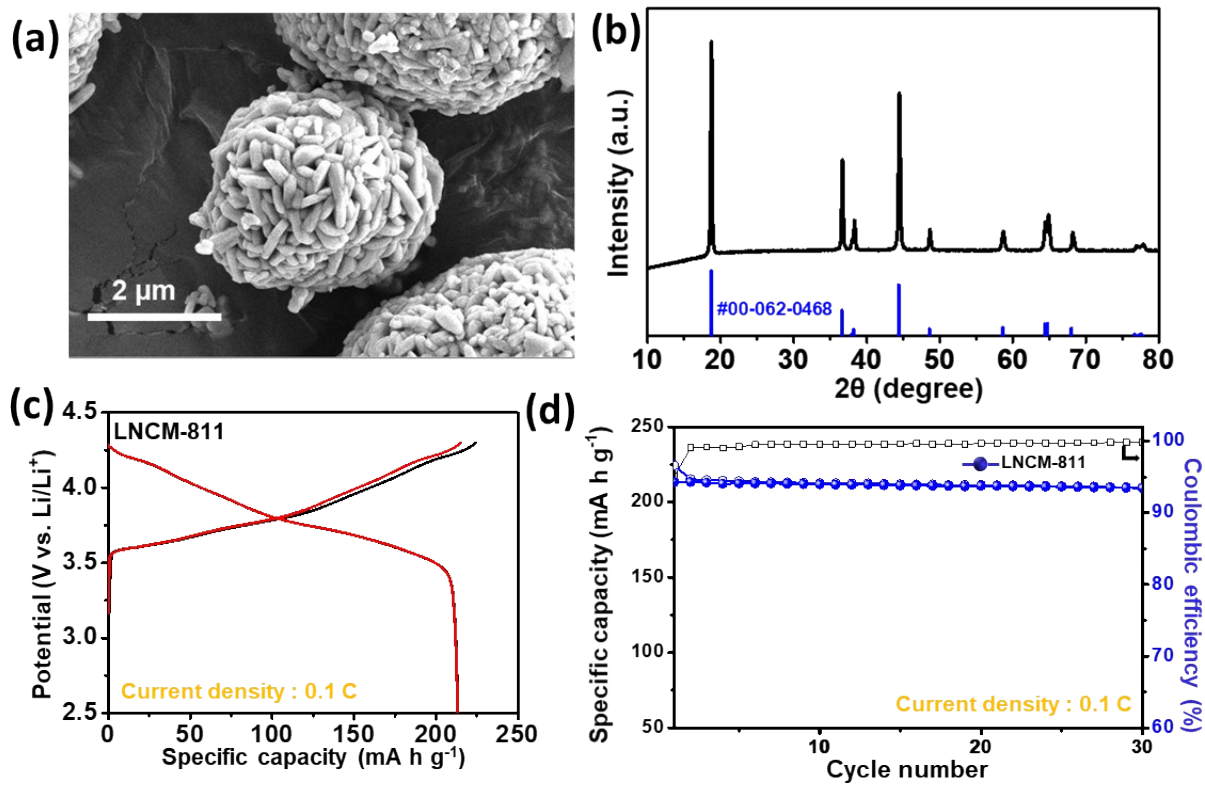

**Fig. S11** (a) SEM image, (b) XRD pattern, (c) voltage profiles, and (d) cycle performance of the LNCM-811 cathode in LIBs at a current density of 0.1 C ( $20 \text{ mA g}^{-1}$ ).

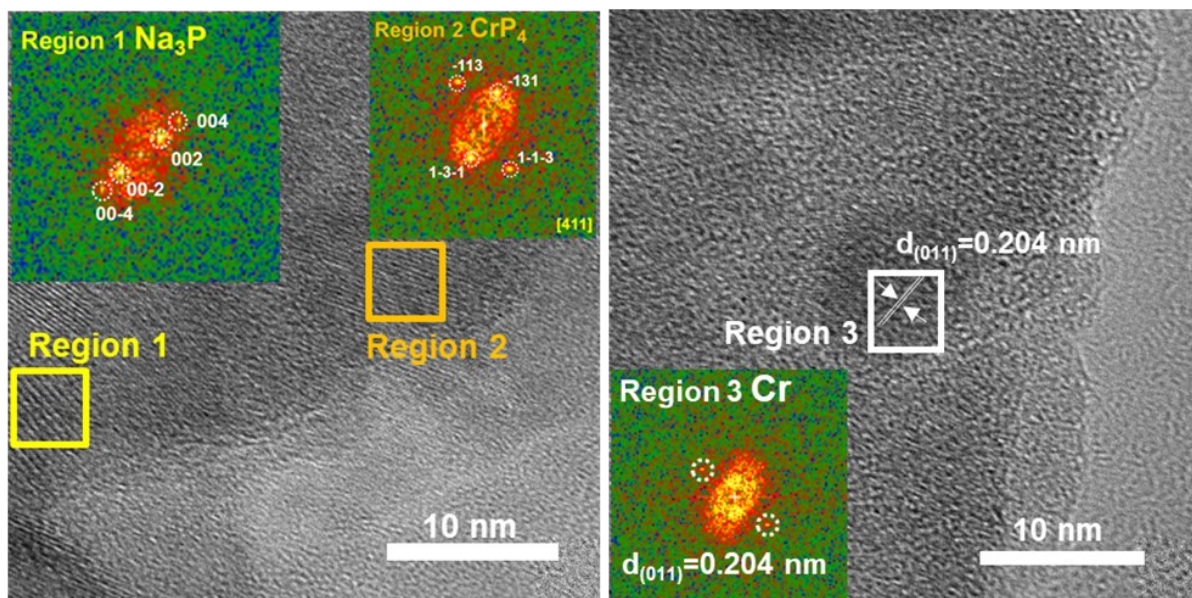

**Fig. S12** HRTEM images and FFT patterns of the 1<sup>st</sup> fully discharged (0.01 V vs. Na/Na<sup>+</sup>)  $\text{CrP}_4$  electrode in SIBs.

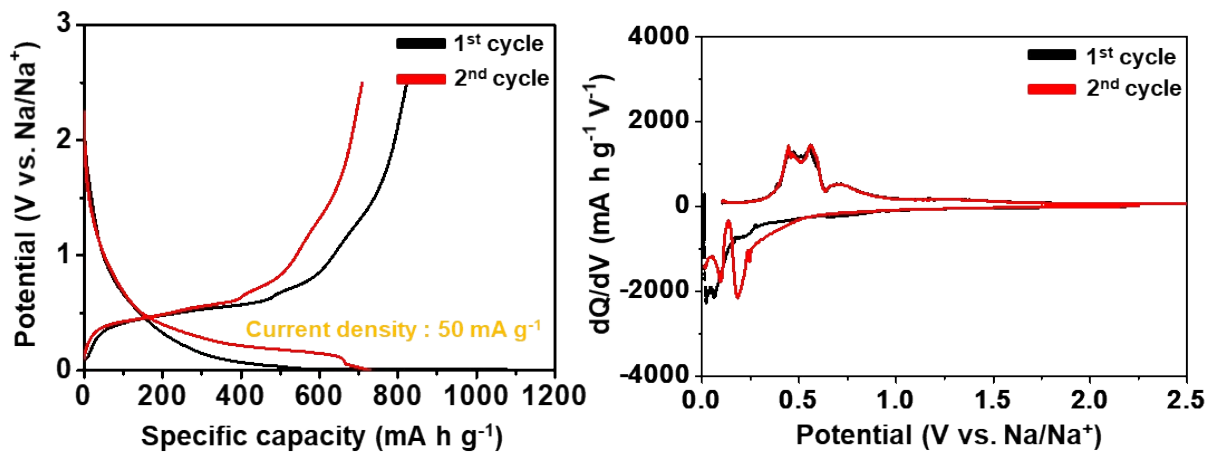

**Fig. S13** Capacity-voltage profiles and corresponding DCPs of the CrP<sub>4</sub>/C electrode in SIBs at a current density of 50 mA g<sup>-1</sup>.

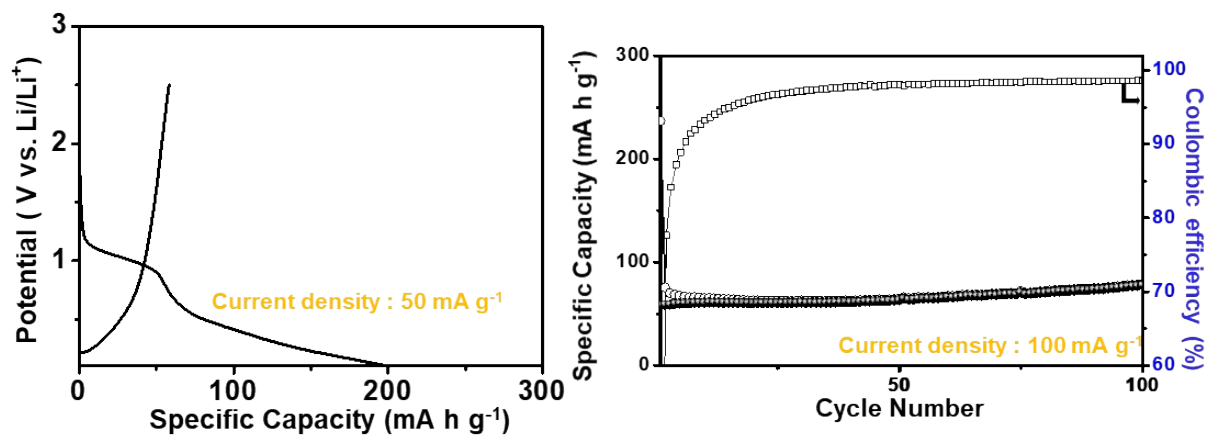

**Fig. S14** Voltage profiles and cycle performance of acetylene carbon black electrode for SIBs at current densities of 50 and 100 mA g<sup>-1</sup>, respectively.

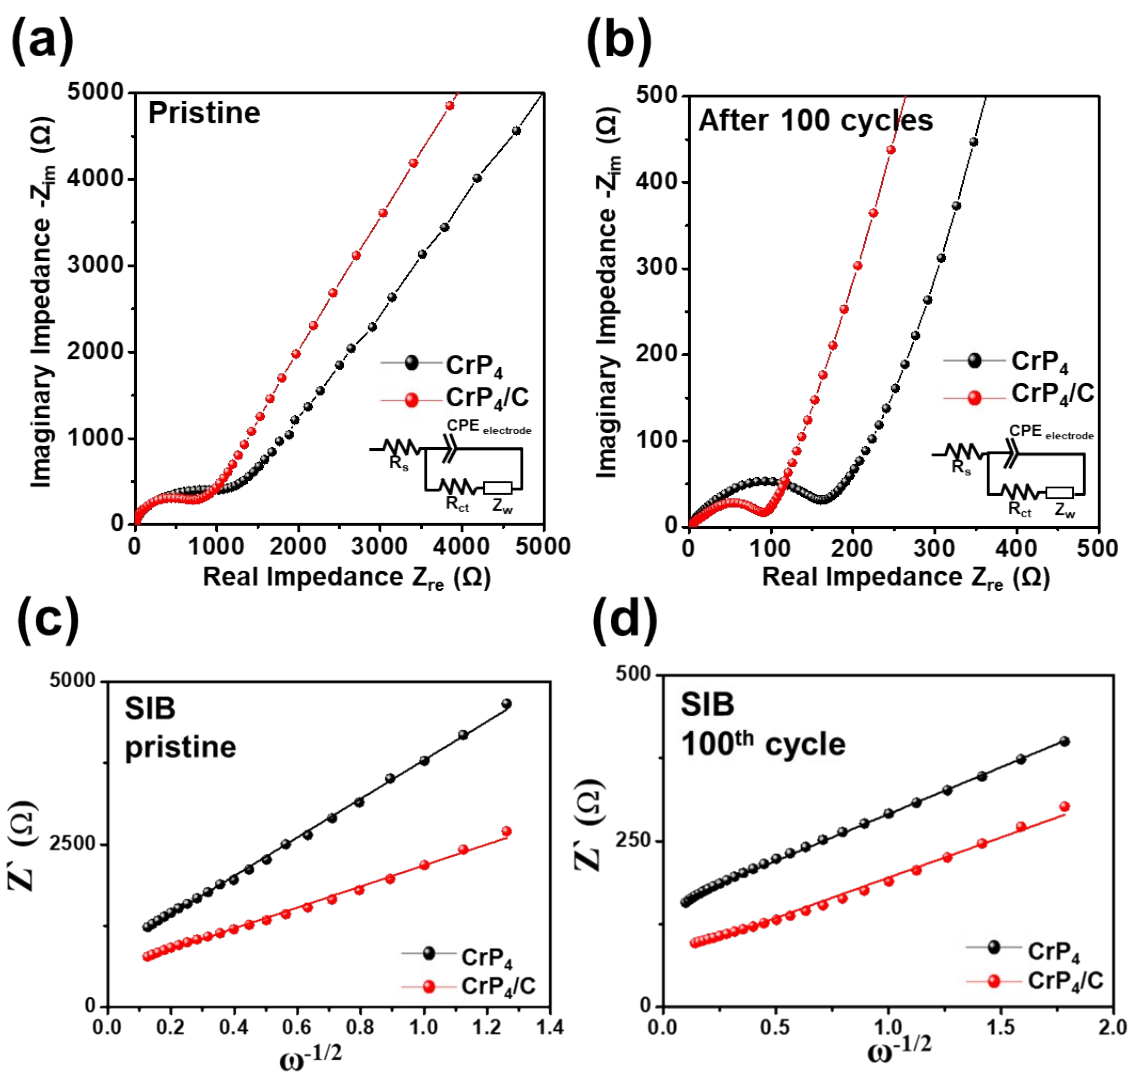

**Fig. S15** Fitted Nyquist plots of  $\text{CrP}_4$  and  $\text{CrP}_4/\text{C}$  electrodes (a) at pristine and (b) after 100 cycles and relationship between  $Z'$  and  $\omega^{-1/2}$  (c) at pristine and (d) after 100 cycles at a current density of  $500 \text{ mA g}^{-1}$  in SIBs.



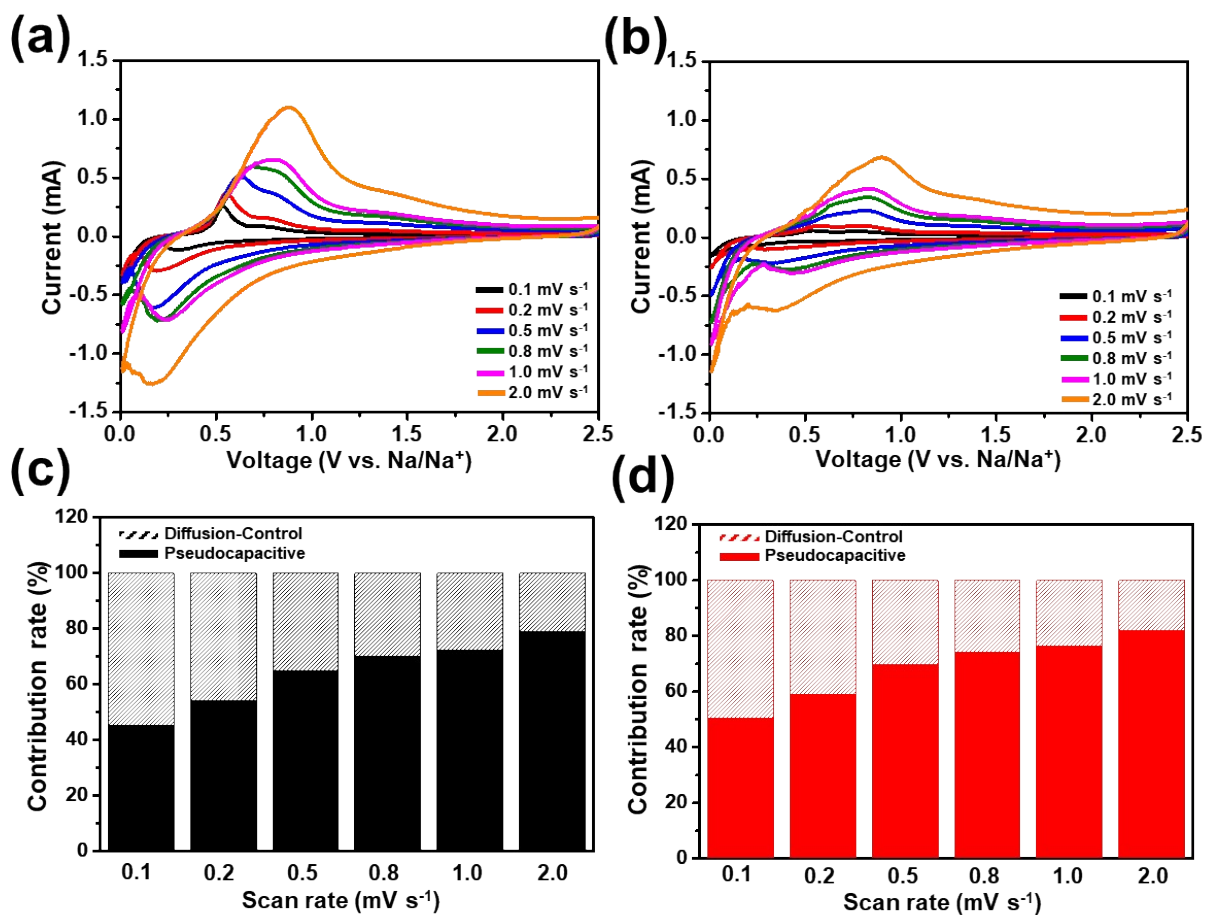

**Fig. S16** CV curves and corresponding normalized contribution ratios of diffusion-controlled and pseudocapacitive-controlled at various scan rates from 0.1-2.0 mV s<sup>-1</sup> of (a, c) CrP<sub>4</sub> and (b, d) CrP<sub>4</sub>/C electrodes in SIBs, respectively.

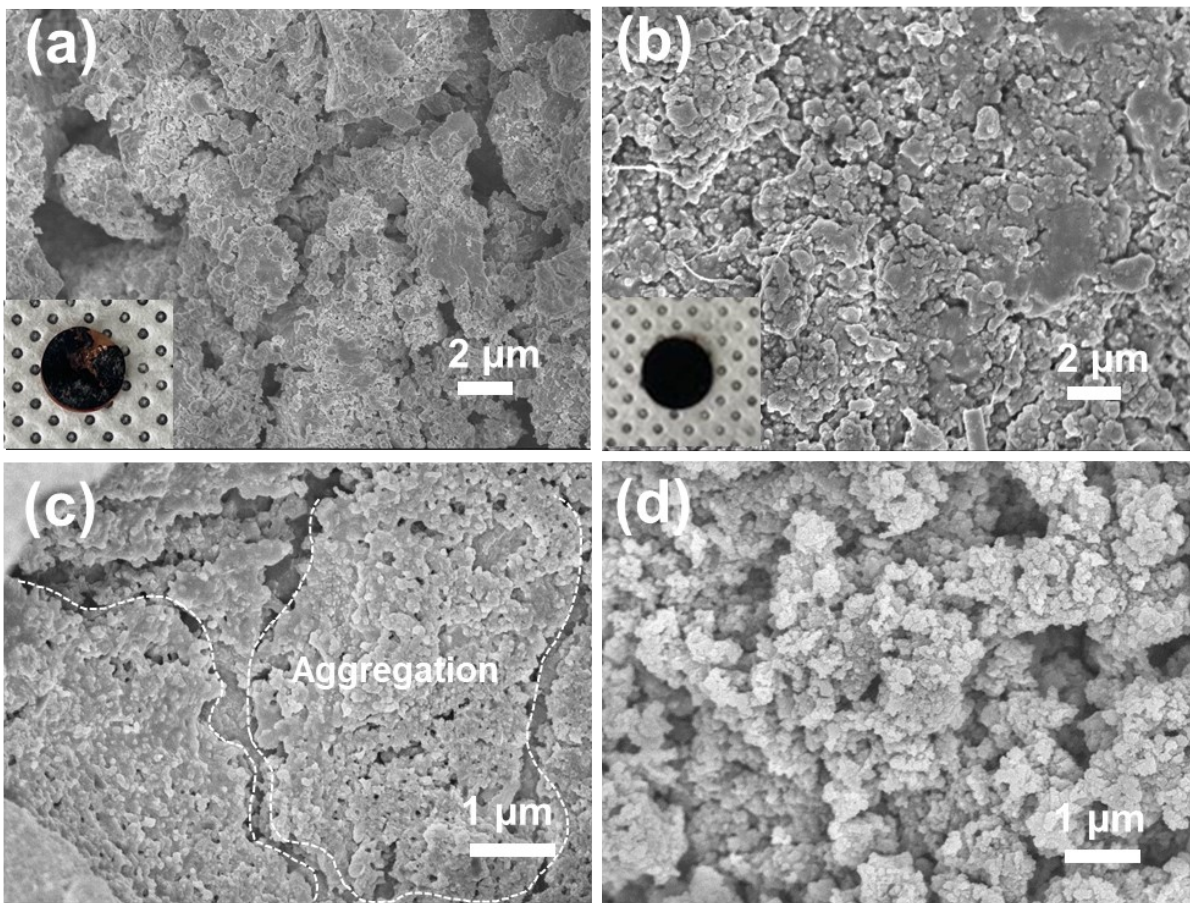

**Fig. S17** SEM images of the electrodes before and after rinsing SEI layer of (a, c) CrP<sub>4</sub> and (b, d) CrP<sub>4</sub>/C electrodes, respectively, after 100 cycles at a current density of 500 mA g<sup>-1</sup> in SIBs (inset in (a) and (b): optical images of each electrodes).

**Table S1** Le Bail fitting result of as-synthesized CrP<sub>4</sub> nanoparticles.

|                          | (Fitting result)  | (ICDD #01-071-0547) |
|--------------------------|-------------------|---------------------|
| <b>Crystal structure</b> | <b>Monoclinic</b> | <b>Monoclinic</b>   |
| <b>Space group</b>       | <b>C 2/c</b>      | <b>C 2/c</b>        |
| <b>a</b>                 | <b>5.2002 Å</b>   | <b>5.1914 Å</b>     |
| <b>b</b>                 | <b>10.7258 Å</b>  | <b>10.7600 Å</b>    |
| <b>c</b>                 | <b>5.8042 Å</b>   | <b>5.7712 Å</b>     |
| <b>α</b>                 | <b>90°</b>        | <b>90°</b>          |
| <b>β</b>                 | <b>110.773°</b>   | <b>110.648°</b>     |
| <b>γ</b>                 | <b>90°</b>        | <b>90°</b>          |

**Table S2** The fitted charge transfer resistance ( $R_{ct}$ ) and ionic diffusion coefficient of  $\text{CrP}_4$  and

|                            | <b><math>\text{CrP}_4</math></b> |                                                    | <b><math>\text{CrP}_4/\text{C}</math></b> |                                                    |
|----------------------------|----------------------------------|----------------------------------------------------|-------------------------------------------|----------------------------------------------------|
|                            | $R_{ct}$ ( $\Omega$ )            | $D_{\text{Li}^+}$ ( $\text{cm}^2 \text{ s}^{-1}$ ) | $R_{ct}$ ( $\Omega$ )                     | $D_{\text{Li}^+}$ ( $\text{cm}^2 \text{ s}^{-1}$ ) |
| <b>Pristine</b>            | <b>626</b>                       | <b><math>8.56 \times 10^{-15}</math></b>           | <b>558.7</b>                              | <b><math>1.06 \times 10^{-14}</math></b>           |
|                            | $R_{ct}$ ( $\Omega$ )            | $D_{\text{Li}^+}$ ( $\text{cm}^2 \text{ s}^{-1}$ ) | $R_{ct}$ ( $\Omega$ )                     | $D_{\text{Li}^+}$ ( $\text{cm}^2 \text{ s}^{-1}$ ) |
| <b>After<br/>50 cycles</b> | <b>49.3</b>                      | <b><math>3.52 \times 10^{-11}</math></b>           | <b>26.4</b>                               | <b><math>4.08 \times 10^{-11}</math></b>           |

$\text{CrP}_4/\text{C}$  electrodes in LIBs.

**Table S3** The fitted charge transfer resistance ( $R_{ct}$ ) and ionic diffusion coefficient of  $\text{CrP}_4$  and  $\text{CrP}_4/\text{C}$  electrodes in SIBs.

|                             | <b><math>\text{CrP}_4</math></b> |                                                    | <b><math>\text{CrP}_4/\text{C}</math></b> |                                                    |
|-----------------------------|----------------------------------|----------------------------------------------------|-------------------------------------------|----------------------------------------------------|
|                             | $R_{ct}$ ( $\Omega$ )            | $D_{\text{Na}^+}$ ( $\text{cm}^2 \text{ s}^{-1}$ ) | $R_{ct}$ ( $\Omega$ )                     | $D_{\text{Na}^+}$ ( $\text{cm}^2 \text{ s}^{-1}$ ) |
| <b>Pristine</b>             | 1265                             | $6.52 \times 10^{-15}$                             | 825.3                                     | $2.20 \times 10^{-14}$                             |
|                             | $R_{ct}$ ( $\Omega$ )            | $D_{\text{Na}^+}$ ( $\text{cm}^2 \text{ s}^{-1}$ ) | $R_{ct}$ ( $\Omega$ )                     | $D_{\text{Na}^+}$ ( $\text{cm}^2 \text{ s}^{-1}$ ) |
| <b>After<br/>100 cycles</b> | 130.3                            | $2.85 \times 10^{-12}$                             | 98.5                                      | $3.91 \times 10^{-12}$                             |
